# Supplementary material for: WS2-induced enhanced optical absorption and efficiency in graphene/silicon heterojunction photovoltaic cells
Source: Royal Society of Chemistry journal article supplement (doi:10.1039/c8nr03194k), 2018-01-01
Supplement: c8nr03194k1.pdf [file c8nr03194k1.pdf]

## Supplementary Information

### WS<sub>2</sub>-Induced Enhanced Optical Absorption and Efficiency in Graphene/Silicon Heterojunction Photovoltaic Cells

Rousan Debbarma, Sanjay K. Behura\*, Yu Wen, Songwei Che, and Vikas Berry\*

Department of Chemical Engineering, University of Illinois at Chicago, 810 S. Clinton Street, Chicago, IL 60607, United States

\*Corresponding authors. E-mail: vikasb@uic.edu; sbehura1@uic.edu.

#### 1. Raman spectra showing the G and 2D bands for graphene on n-Si with and without WS<sub>2</sub>.

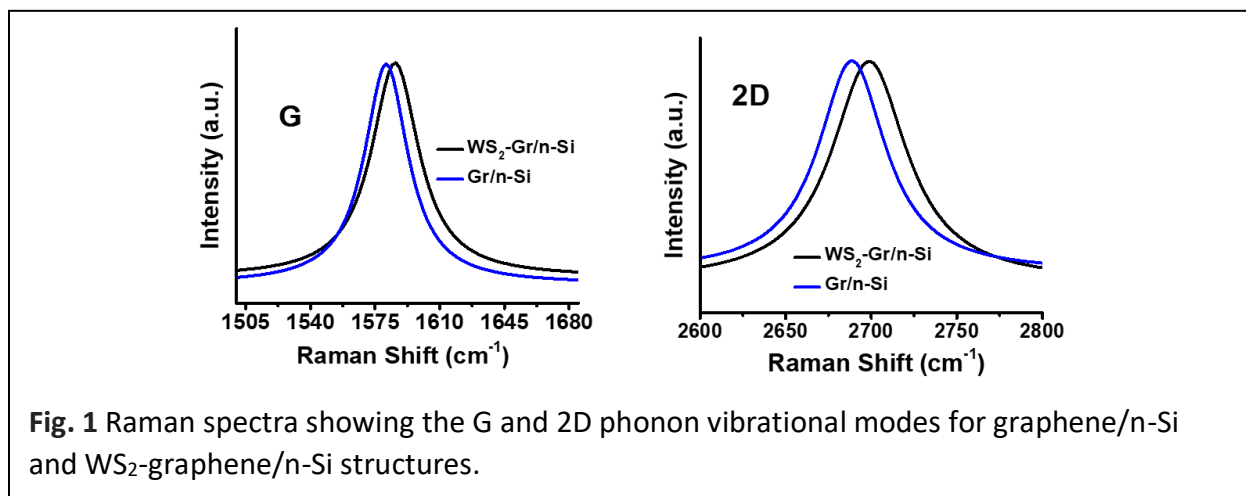

#### 2. Current density vs. voltage (J-V) characteristic under illumination for a second graphene/n-Si and WS<sub>2</sub>-graphene/n-Si device.

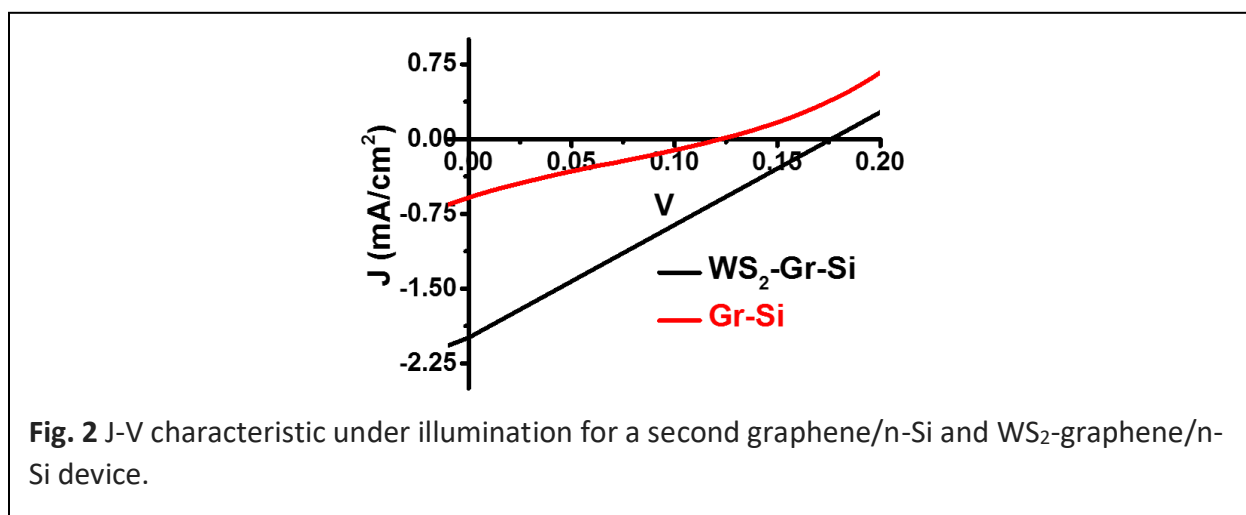

### 3. Transmission Electron Microscopy Characterization for WS<sub>2</sub>-Graphene Film.

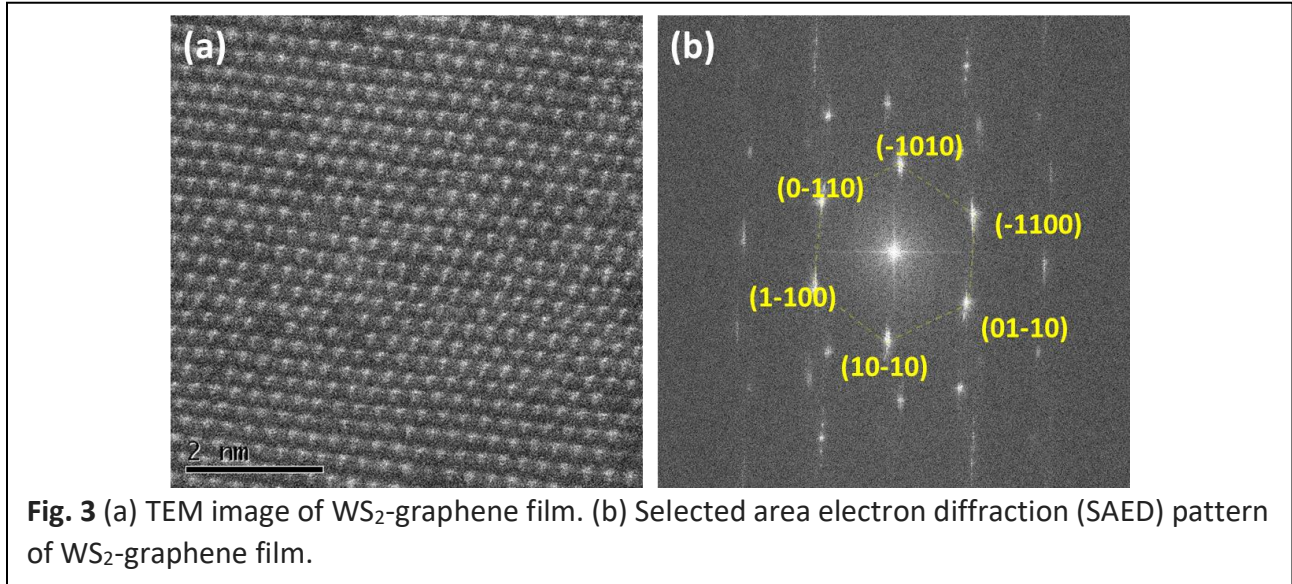

### 4. Doping Levels of Graphene in WS<sub>2</sub>-Graphene/n-Si Heterostructure.

The doping level for the graphene sheet has been calculated from the shift in the graphene G peak position. The upshifts in the peak positions of both the G and 2D peak positions point to the electron (n) doping of the underlying graphene after the deposition of WS<sub>2</sub> layers *via* chemical vapor deposition.<sup>1</sup> The table below shows the peak positions (also shown in the Raman spectra in the above Figure 1).

|                                      | Graphene/n-Si | WS <sub>2</sub> -Graphene/n-Si |
|--------------------------------------|---------------|--------------------------------|
| G peak position (cm <sup>-1</sup> )  | 1581          | 1586                           |
| 2D peak position (cm <sup>-1</sup> ) | 2688          | 2699                           |

At room temperature (298 K) the G peak position for undoped graphene is 1579 cm<sup>-1</sup>.<sup>2</sup> The total shift in the G peak position can be modelled as:

$$\Delta\omega = \Delta\omega_A + \Delta\omega_{NA}$$

where  $\Delta\omega_A$  and  $\Delta\omega_{NA}$  represent shifts due to adiabatic and non-adiabatic contributions.<sup>3</sup> The adiabatic contribution<sup>4</sup> is given by the formula:

$$\Delta\omega_A = -2.13n - 0.036n^2 - 0.00329n^3 - 0.226|n|^{3/2}$$

where  $\Delta\omega_A$  is the shift in cm<sup>-1</sup> and n is the charge carrier concentration in graphene (10<sup>13</sup> cm<sup>-2</sup>). The non-adiabatic contribution is given by:

$$\Delta\omega_{NA} = \frac{2\pi\alpha P}{h} \int_{-\infty}^{\infty} \frac{[f(E - E_F) - f(E)]E^2 \text{sgn}(E)}{E^2 - \left(\frac{h\omega_0}{4\pi}\right)^2} dE$$

where  $\Delta\omega_{NA}$  is the shift in  $\text{cm}^{-1}$ ,  $\alpha=4.39 \times 10^{-3}$  is a constant, P is the principal part, h is the Planck constant, f is the Fermi-Dirac distribution,  $E_F$  is the Fermi energy, and  $\omega_0$  is the G mode frequency of the undoped graphene.<sup>5</sup> For  $|E_F| < 1 \text{ eV}$  the adiabatic contribution to the total peak shift can be ignored:

$$\Delta\omega \approx \Delta\omega_{NA}$$

The non-adiabatic shift exhibits asymptotic behavior when  $|E_F| \gg h\omega_0/4\pi$  and the total shift exhibits a linear relationship with the Fermi energy. For  $E_F \geq 100 \text{ meV}$  (electron doping), the linear relationship between the G peak shift and the Fermi energy is given by:

$$E_F = 21\Delta\omega + 75$$

where  $E_F$  is in meV and  $\Delta\omega$  is in  $\text{cm}^{-1}$ . The Fermi energy can be further related to the carrier concentration by the formula:

$$E_F = \frac{\text{sgn}(n)\sqrt{n\pi}h v_F}{2\pi}$$

where n is the carrier concentration and  $v_F$  is the Fermi velocity ( $v_F = 1.1 \times 10^6 \text{ m/s}$ ). The calculated Fermi energy and doping levels are shown in the table below.

|                                 | Graphene/n-Si         | WS <sub>2</sub> -Graphene/n-Si |
|---------------------------------|-----------------------|--------------------------------|
| $\Delta\omega (\text{cm}^{-1})$ | 2                     | 7                              |
| $E_F (\text{meV})$              | 117                   | 222                            |
| $n (\text{cm}^{-2})$            | $8.28 \times 10^{11}$ | $2.98 \times 10^{12}$          |

The doping levels of the graphene exhibited an increase of 260% on the deposition of WS<sub>2</sub> layers.

## References

- (1) Das, A.; Pisana, S.; Chakraborty, B.; Piscanec, S.; Saha, S. K.; Waghmare, U. V.; Novoselov, K. S.; Krishnamurthy, H. R.; Geim, A. K.; Ferrari, A. C.; Sood, A. K. *Nat. Nanotechnol.* **2008**, *3*, 210.
- (2) Calizo, I.; Balandin, A. A.; Bao, W.; Miao, F.; Lau, C. N. *Nano Lett.* **2007**.
- (3) Froehlicher, G.; Berciaud, S. *Phys. Rev. B - Condens. Matter Mater. Phys.* **2015**.
- (4) Lazzeri, M.; Mauri, F. *Phys. Rev. Lett.* **2006**.
- (5) Pisana, S.; Lazzeri, M.; Casiraghi, C.; Novoselov, K. S.; Geim, A. K.; Ferrari, A. C.; Mauri, F. *Nat. Mater.* **2007**.
